# Supplementary material
Source: MDPI journal article supplement (https://www.mdpi.com/2311-5637/10/4/196)
Supplement: s1 [file s1 › fermentation-2924219-supplementary.pdf]

## SUPPLEMENTARY INFORMATION

### Lactic Acid Bacteria Isolation from Üçburun Peppers and Comparison of the Different Production Process for Pickled Pepper

Ali Nalbant and Esra Ersoy Omeroglu \*

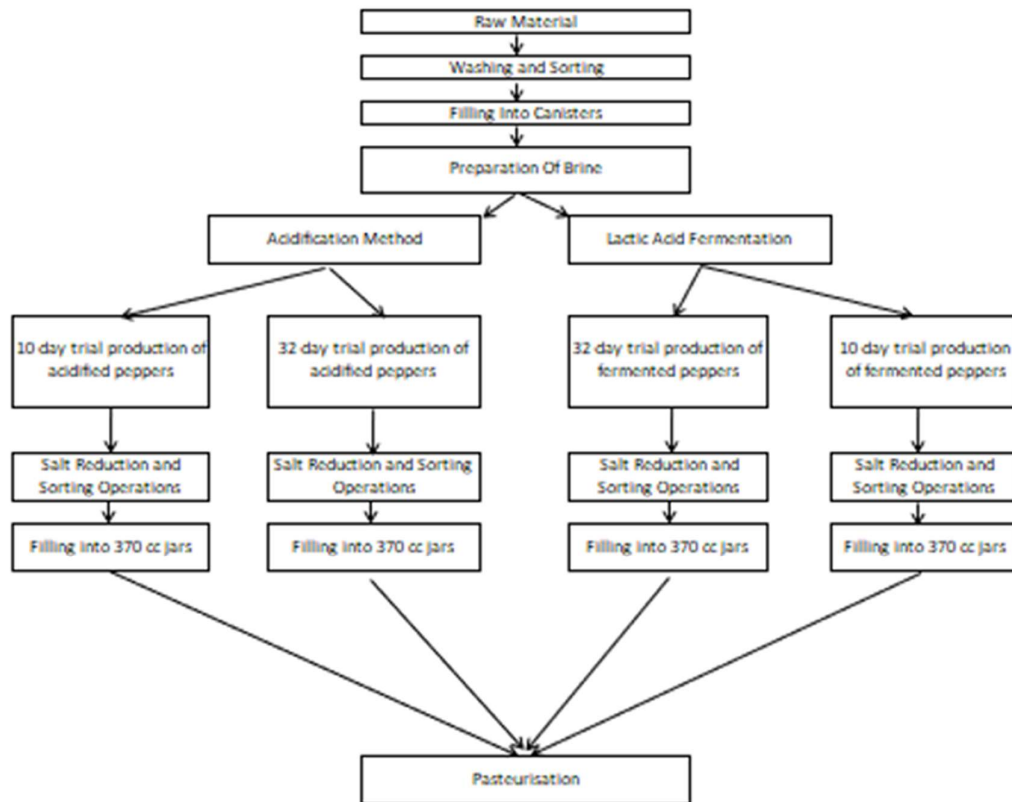

**Figure S1.** Flow Chart of Assay Production.

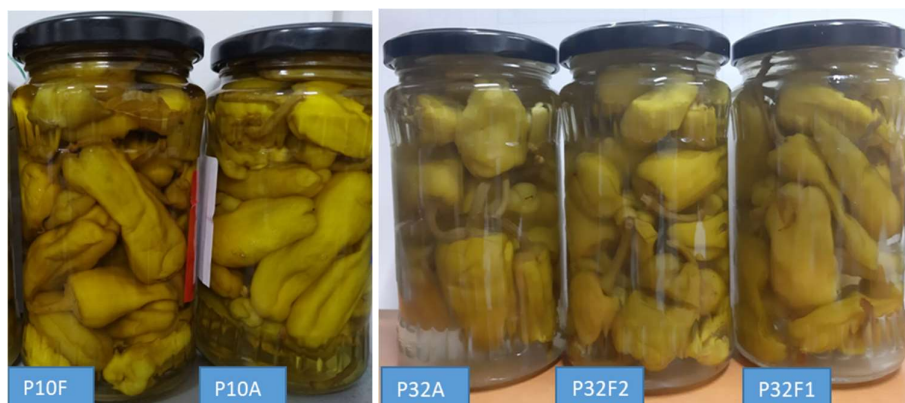

**Figure S2.** Pickled jars of Üçburun peppers pickled.

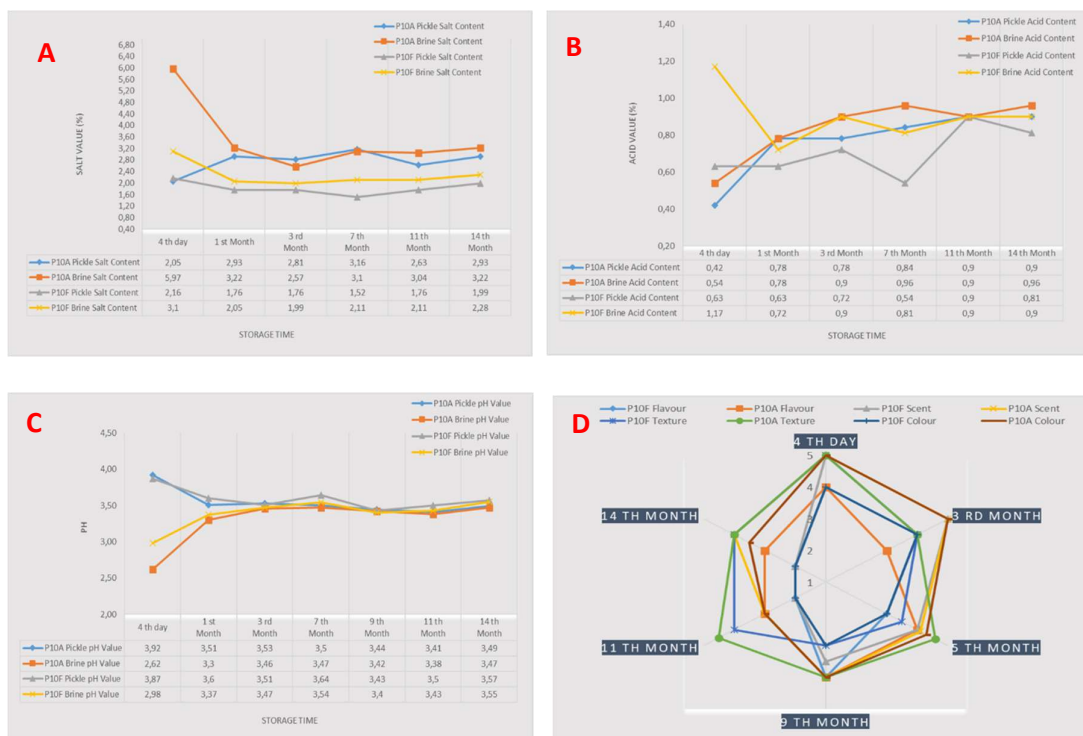

**Figure S3.** Results of chemical analysis performed during storage of products produced with semi-finished products taken on the 10th day of fermentation. **A:** salt content, **B:** acid content, **C:** pH value, **D:** flavor, texture, scent and colour.

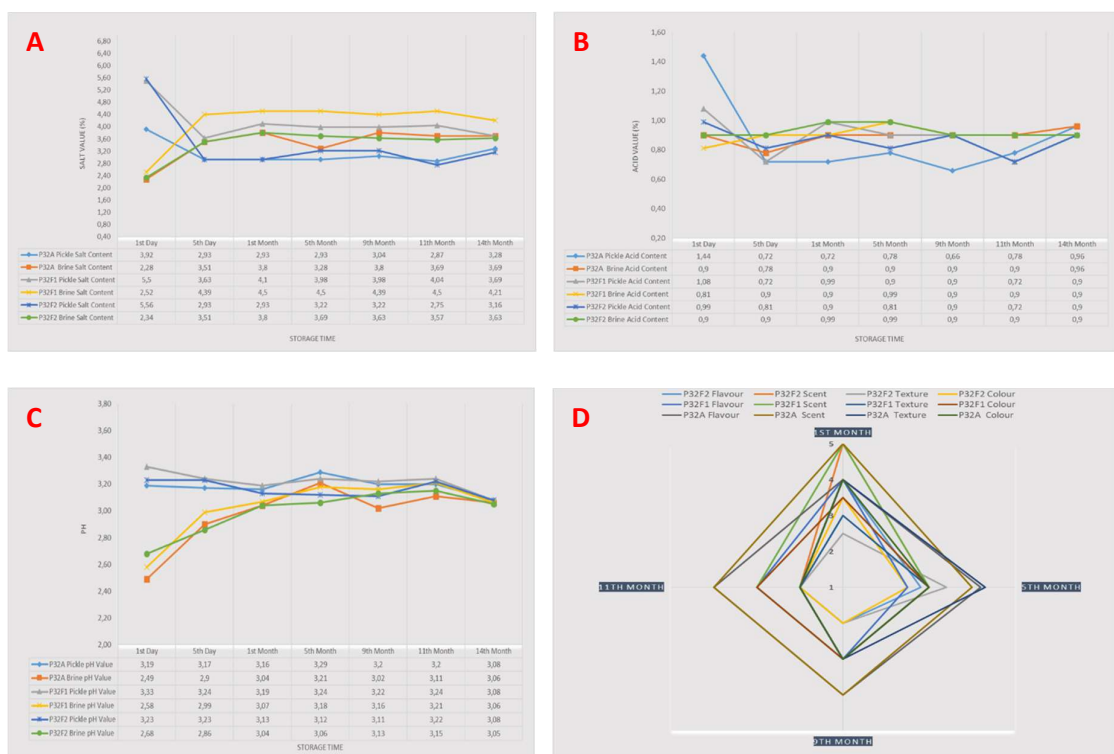

**Figure S4.** Results of chemical analysis performed during storage of products produced with semi-finished products taken on the 32nd day of fermentation. **A:** salt content, **B:** acid content, **C:** pH value, **D:** flavor, texture, scent and colour.

**Table S1.** Microbiological analysis results on the 4th day, 7th month and 14th month of storage.

| Sample No | Storage Time           | Total Aerobic Mesophilic Microorganism Counts (CFU/g) | Yeast Count (CFU/g) | Mold Count (CFU/g) | LAB Counts (CFU/g)  |
|-----------|------------------------|-------------------------------------------------------|---------------------|--------------------|---------------------|
| P10A      | 4 <sup>th</sup> Day    | 3,0 x10 <sup>1</sup>                                  | <10                 | <10                | <10                 |
|           | 7 <sup>th</sup> Month  | <10                                                   | <10                 | <10                | <10                 |
|           | 14 <sup>th</sup> Month | <10                                                   | <10                 | <10                | <10                 |
| P10F      | 4 <sup>th</sup> Day    | 3,8 x10 <sup>1</sup>                                  | <10                 | <10                | <10                 |
|           | 7 <sup>th</sup> Month  | <10                                                   | <10                 | <10                | <10                 |
|           | 14 <sup>th</sup> Month | <10                                                   | <10                 | <10                | <10                 |
| P32A      | 4 <sup>th</sup> Day    | <10                                                   | <10                 | <10                | <10                 |
|           | 1 <sup>st</sup> Month  | <10                                                   | <10                 | <10                | <10                 |
|           | 5 <sup>th</sup> Month  | <10                                                   | <10                 | <10                | <10                 |
|           | 10 <sup>th</sup> Month | <10                                                   | <10                 | <10                | <10                 |
|           | 24 <sup>th</sup> Month | <10                                                   | <10                 | <10                | <10                 |
| P32F1     | 4 <sup>th</sup> Day    | <10                                                   | <10                 | <10                | <10                 |
|           | 1 <sup>st</sup> Month  | 4,0x10 <sup>1</sup>                                   | 2,9x10 <sup>4</sup> | <10                | <10                 |
|           | 5 <sup>th</sup> Month  | <10                                                   | <10                 | <10                | <10                 |
|           | 10 <sup>th</sup> Month | 3,6x10 <sup>3</sup>                                   | 4,6x10 <sup>3</sup> | <10                | 5,0x10 <sup>3</sup> |
| P32F2     | 4 <sup>th</sup> Day    | 8,5x10 <sup>1</sup>                                   | 4,3x10 <sup>3</sup> | <10                | <10                 |
|           | 1 <sup>st</sup> Month  | 7,0x10 <sup>1</sup>                                   | 2,5x10 <sup>4</sup> | <10                | <10                 |
|           | 5 <sup>th</sup> Month  | <10                                                   | <10                 | <10                | <10                 |
|           | 10 <sup>th</sup> Month | 7,6x10 <sup>3</sup>                                   | 6,7x10 <sup>3</sup> | <10                | 1,3x10 <sup>4</sup> |
